# Supplementary material for: Fluorescence of sanguinarine: spectral changes on interaction with amino acids
Source: Royal Society of Chemistry journal article supplement (doi:10.1039/b925828k), 2010-01-01
Supplement: b925828k.pdf [file b925828k.pdf]

**Supplementary Material to the paper of Janovska et al.**

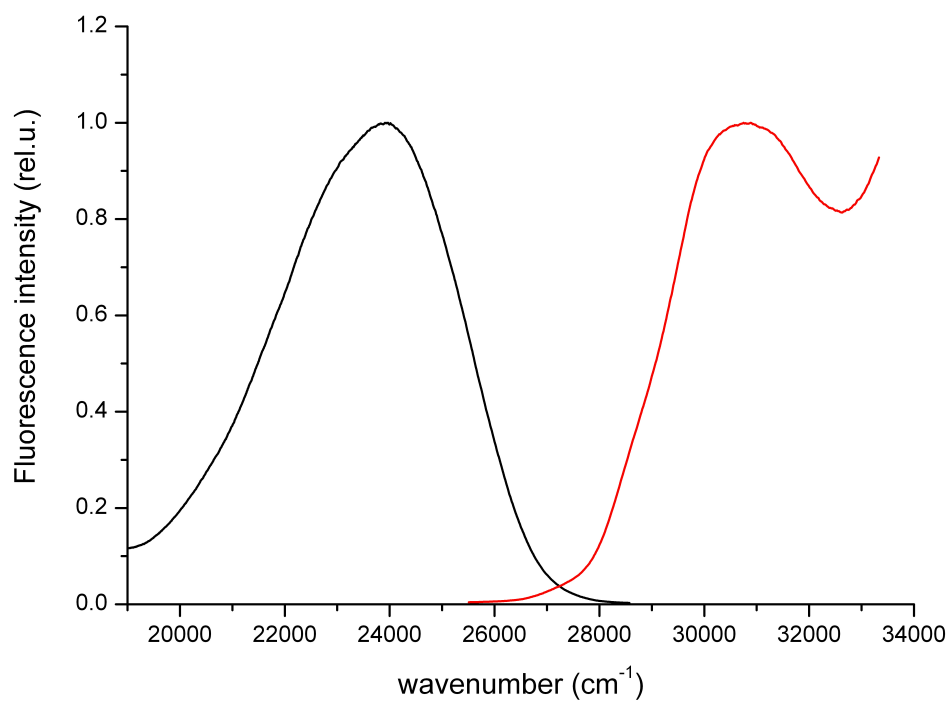

**Figure S1** Excitation (red) and emission (black) spectrum of SGOH.

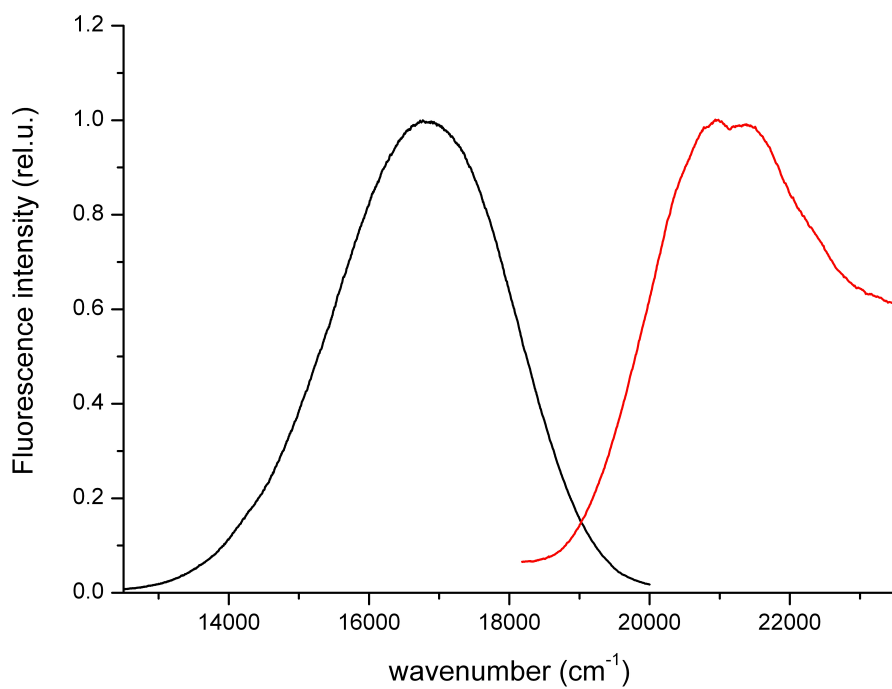

**Figure S2** Excitation (red) and emission (black) spectrum of  $\text{SG}^+$ .

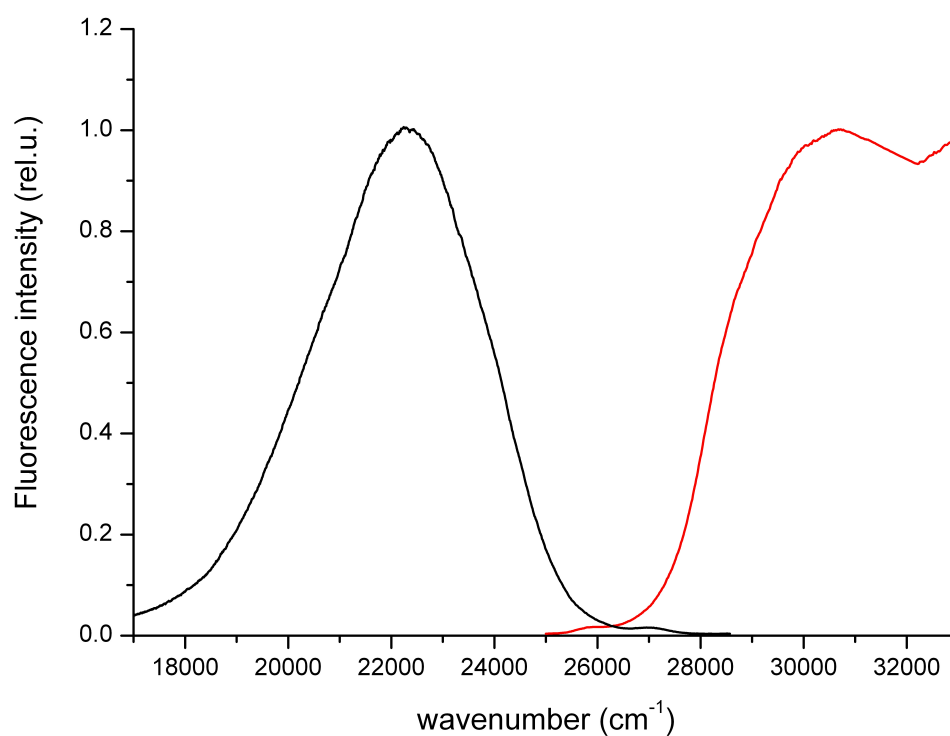

**Figure S3** Excitation (red) and emission (black) spektrum of DHSG.

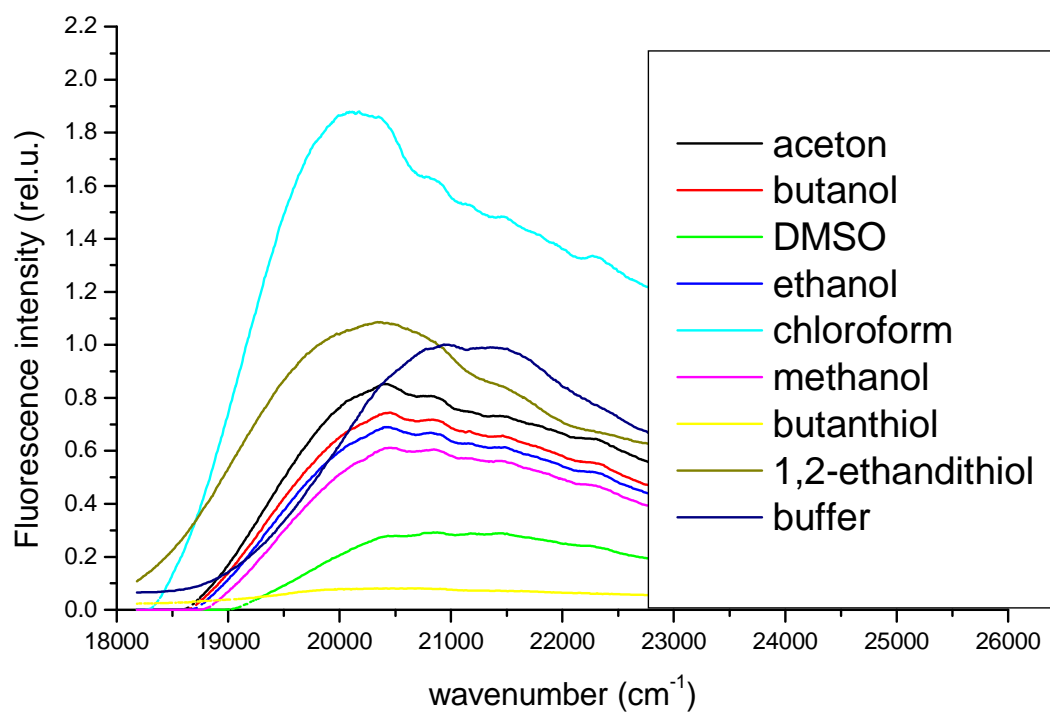

**Figure S4** Excitation spektrum of SG<sup>+</sup> in various solvents.

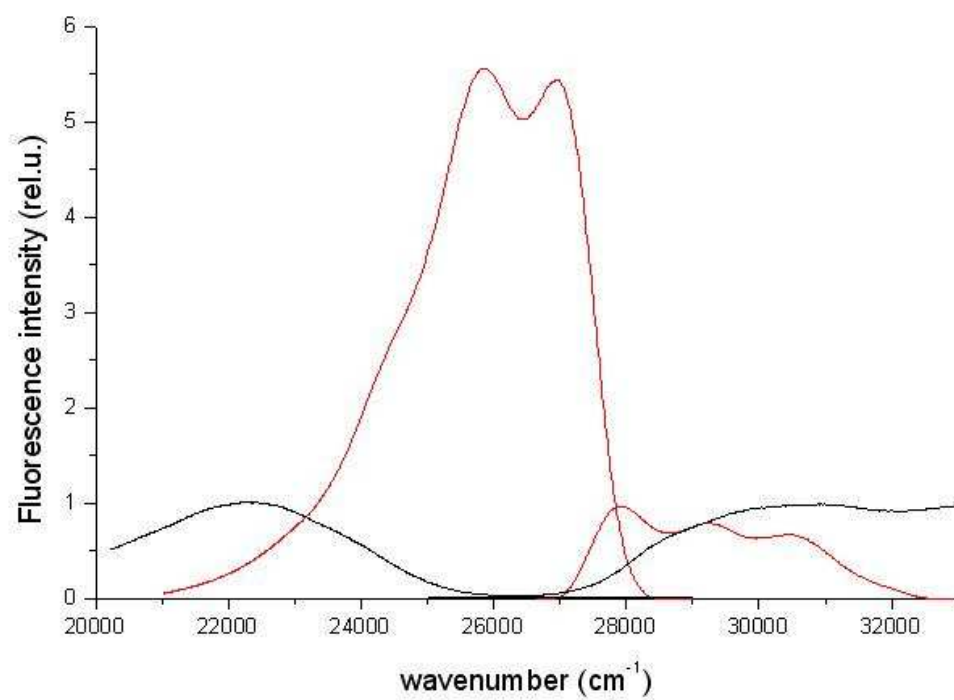

**Figure S5** Excitation (right) and emission (left) spectra of DHSG in aqueous buffer (black) and 1,2-ethanedithiol.
